# Supplementary material
Source: PubMed Central journal article supplement (PMC3119779)
Supplement: NIHMS284898-supplement-1.pdf [file NIHMS284898-supplement-1.pdf]

## SUPPLEMENTAL MATERIAL

**Supplemental Table 1:** Numbers of vascular cognitive impairment (VCI) patients and controls studied divided into preliminary diagnostic categories. Subcortical ischemic vascular disease (SIVD) had white matter hyperintensities, focal neurological findings, and imbalance. Multiple infarcts (MI) had cortical or lacunar strokes or single strategic strokes. Mixed (MX) had symptoms suggestive of both vascular and Alzheimer's disease. Patients with white matter hyperintensities (WMHs) with nondiagnostic symptoms were classified as leukoaraiosis (LA).

| <u>Diagnostic Groups</u> | <u>Numbers of Subjects</u> | <u>Age</u><br>Mean years (SD) |
|--------------------------|----------------------------|-------------------------------|
| SIVD                     | 19                         | 64.79 (11.62)                 |
| MI                       | 9                          | 55.56 (16.18)                 |
| MX                       | 6                          | 73.17 (7.20)                  |
| LA                       | 8                          | 60.62 (14.25)                 |
| Technical failures       | 3                          | —                             |
| Total                    | 45                         | F(3,38) = 2.50, p=.07         |

**Supplemental Table 2:** Clinical information on controls without neurological illnesses were undergoing spinal anesthesia for surgery

| <b>Control Number</b> | <b>Sex</b> | <b>Age</b> | <b>Diagnosis</b>            |
|-----------------------|------------|------------|-----------------------------|
| C001                  | M          | 40         | pneumonia                   |
| C002                  | F          |            | pregnant                    |
| C003                  | M          | 80         | Unknown                     |
| C005                  | F          | 35         | pregnant                    |
| C006                  | F          | 23         | pregnant                    |
| C007                  | F          | 24         | post partum                 |
| C008                  | F          | 37         | pregnant; asthma            |
| C009                  | F          | 55         | meniscal tear               |
| C014                  | F          | 32         | pregnant/CS                 |
| C015                  | F          | 62         | chronic renal failure       |
| C016                  | M          | 54         | Hypertension                |
| C017                  | M          | 55         | BHP/TURP                    |
| C019                  | M          | 72         | peripheral vascular disease |
| C020                  | M          | 22         | anal condyloma              |
| C021                  | F          | 65         | meniscal repair             |
| C022                  | M          | 30         | varicocele                  |
| C025                  | M          | 41         | Unknown                     |
| C030                  | M          | 48         | meniscal repair             |
